# Supplementary material for: Uncommon Adverse Events of Immune Checkpoint Inhibitors in Small Cell Lung Cancer: A Systematic Review of Case Reports
Source: MDPI journal article supplement (doi:10.3390/cancers16101896), 2024-05-16
Supplement: s1 [file s1]

**Supplementary Table S1** Quality assurance of included studies

| First Author (Year) | Source                               | Quality of case report |            |                   |             |                |       |
|---------------------|--------------------------------------|------------------------|------------|-------------------|-------------|----------------|-------|
|                     |                                      | Documentation          | Uniqueness | Educational value | Objectivity | Interpretation | Total |
| Chen (2023)         | <i>Front. Oncol</i>                  | 2                      | 1          | 1                 | 2           | 2              | 8     |
| Evin (2022)         | <i>Diagnostics (Basel)</i>           | 1                      | 1          | 2                 | 2           | 2              | 8     |
| Lin (2021)          | <i>Am J Case Rep</i>                 | 1                      | 1          | 2                 | 2           | 2              | 8     |
| Nakai (2023)        | <i>Respir Med Case Rep</i>           | 2                      | 1          | 2                 | 2           | 2              | 9     |
| Qiu (2022)          | <i>Transl Lung Cancer Res</i>        | 2                      | 2          | 2                 | 2           | 2              | 10    |
| Sahin (2023)        | <i>J Oncol Pharm Pract</i>           | 2                      | 1          | 1                 | 2           | 2              | 8     |
| Moss (2023)         | <i>Front. Immunol</i>                | 2                      | 1          | 2                 | 2           | 2              | 9     |
| Wang (2023)         | <i>Invest New Drug</i>               | 2                      | 2          | 2                 | 2           | 2              | 10    |
| Wen (2022)          | <i>Medicine (Baltimore)</i>          | 1                      | 2          | 2                 | 2           | 2              | 9     |
| Zhang (2023)        | <i>Clin Cosmet Investig Dermatol</i> | 2                      | 2          | 2                 | 2           | 2              | 10    |
| DeMaio (2022)       | <i>JAAD Case Rep</i>                 | 2                      | 1          | 2                 | 2           | 2              | 9     |
| Raibagkar (2020)    | <i>J Neuroimmunol</i>                | 2                      | 2          | 2                 | 2           | 2              | 10    |
| Zhu (2019)          | <i>Onco Targets Ther</i>             | 1                      | 2          | 1                 | 1           | 2              | 7     |
| Liang (2019)        | <i>Front. Oncol</i>                  | 1                      | 2          | 2                 | 2           | 2              | 9     |
| Farid (2020)        | <i>Cureus</i>                        | 2                      | 2          | 2                 | 2           | 2              | 10    |
| Mavrotas (2020)     | <i>Prog Neurol Psychiatry</i>        | 2                      | 1          | 1                 | 2           | 2              | 8     |
| Sirgiovanni (2021)  | <i>Thorac Cancer</i>                 | 2                      | 2          | 2                 | 2           | 2              | 10    |
| Valecha (2019)      | <i>J Oncol Pharm Pract</i>           | 2                      | 2          | 2                 | 2           | 2              | 10    |
| Williams (2016)     | <i>JAMA Neurol</i>                   | 2                      | 2          | 2                 | 2           | 2              | 10    |
| Sun (2018)          | <i>J Immunother</i>                  | 2                      | 2          | 2                 | 2           | 2              | 10    |
| Liu (2022)          | <i>Transl Oncol</i>                  | 2                      | 1          | 1                 | 2           | 1              | 7     |
| Li (2021)           | <i>Thorac Cancer</i>                 | 2                      | 2          | 2                 | 2           | 2              | 10    |
| Chen (2022)         | <i>Transl Cancer Res</i>             | 2                      | 2          | 2                 | 2           | 2              | 10    |
| Qu (2021)           | <i>Ann Palliat Med</i>               | 2                      | 1          | 2                 | 2           | 2              | 9     |

Listed by immune-checkpoint inhibitors, and within each agent, listed in alphabetical order of the first author's name.
